# Supplementary material for: Integration of lodging resistance QTL in soybean
Source: PubMed Central journal article supplement (PMC6484036; doi:10.1038/s41598-019-42965-6), 2019-04-25
Supplement: 41598_2019_42965_MOESM1_ESM.pdf [file 41598_2019_42965_MOESM1_ESM.pdf]

## Integration of lodging resistance QTL in soybean

Sadal Hwang<sup>1</sup> and Tong Geon Lee

Supplemental Table 1. Analysis of variance for lodging in the Harosoy x Clark population.

| Source             | <i>d.f.</i> <sup>a</sup> | MS <sup>b</sup> | F-value | <i>Pr</i> > F |
|--------------------|--------------------------|-----------------|---------|---------------|
| Water              | 1                        | 21.5651         | 0.36    | 0.6577        |
| Year               | 1                        | 40.9509         | 0.67    | 0.5618        |
| Year x Water       | 1                        | 60.6426         | 167.29  | < 0.0001      |
| Replication        | 1                        | 0.0037          | 0.01    | 0.9365        |
| Block(Replication) | 15                       | 0.5678          | 2.24    | 0.0043        |
| RIL                | 284                      | 2.2383          | 3.49    | < 0.0001      |
| Year x RIL         | 299                      | 0.6240          | 1.72    | < 0.0001      |
| Water x RIL        | 299                      | 0.3803          | 1.05    | 0.3393        |
| Year x Water x RIL | 299                      | 0.3625          | 1.43    | < 0.0001      |
| Error              | 1184                     | 0.2536          |         |               |

<sup>1</sup> *d.f.*, degree of freedom.

<sup>2</sup> *MS*, mean square.

Supplemental Table 2. Previous QTL data for lodging.

| Reference          | Chr. | QTL marker <sup>a</sup> | Position    | LOD or<br><i>P</i> value | R <sup>2</sup> | Flanking markers <sup>b</sup> | Field location and/or<br>year            |
|--------------------|------|-------------------------|-------------|--------------------------|----------------|-------------------------------|------------------------------------------|
| Mansur et al. 1993 | 19   | G173_1                  | 76.025      | LOD = 8.9                | 0.45           | A461_1                        | BARC-013007-00419<br>Ames, IW, 1991-1992 |
| Mansur et al. 1996 | 06   | A109_2                  | 104.07<br>2 | <i>P</i> ≤ 0.0010        | 0.17           | Satt557                       | Satt557<br>-                             |
| Mansur et al. 1996 | 16   | A060_1                  | 26.359      | <i>P</i> ≤ 0.0010        | 0.06           | A204_1                        | BARC-029477-06200<br>-                   |
| Mansur et al. 1996 | 19   | BLT007_1                | 8.653       | <i>P</i> ≤ 0.0010        | 0.07           | Sle3_4s                       | Satt182<br>-                             |
| Mansur et al. 1996 | 19   | Satt006                 | 81.025      | <i>P</i> ≤ 0.0010        | 0.27           | BARC-013007-00419             | BARC-014655-01607<br>-                   |
| Lee et al. 1996a   | 04   | BARC-015121-02570       | 100.56<br>5 | <i>P</i> = 0.0080        | 0.07           | Bng012_1                      | A074_1<br>Combined <sup>c</sup>          |
| Lee et al. 1996a   | 04   | BARC-013699-01240       | 97.433      | <i>P</i> = 0.0240        | 0.05           | Bng012_1                      | BARC-032045-07244<br>Combined            |
| Lee et al. 1996a   | 08   | A117_1                  | 91.877      | <i>P</i> = 0.0020        | 0.09           | BARC-031601-07118             | BARC-057653-14889<br>Combined            |
| Lee et al. 1996a   | 08   | BARC-055945-13878       | 102.18<br>1 | <i>P</i> = 0.0310        | 0.05           | BARC-014453-01374             | BARC-028975-06047<br>Combined            |
| Lee et al. 1996a   | 09   | BARC-039101-07449       | 69.997      | <i>P</i> = 0.0240        | 0.05           | Sct_190                       | BARC-030025-06777<br>Combined            |
| Lee et al. 1996a   | 13   | Sat_197                 | 77.324      | <i>P</i> = 0.0230        | 0.06           | Satt362                       | A566_1<br>Combined                       |
| Lee et al. 1996a   | 13   | K014_2                  | 82.094      | <i>P</i> = 0.0440        | 0.04           | BARC-013257-00462             | BARC-025915-05157<br>Combined            |
| Lee et al. 1996a   | 15   | BARC-014819-01679       | 35.006      | <i>P</i> = 0.0480        | 0.09           | A636_1                        | B2<br>Combined                           |
| Lee et al. 1996a   | 15   | A597_1                  | 71.128      | <i>P</i> = 0.0190        | 0.05           | A646_1                        | A226H_2<br>Combined                      |
| Lee et al. 1996a   | 15   | BLT049_5                | 77.746      | <i>P</i> = 0.0410        | 0.04           | A646_1                        | Satt231<br>Combined                      |
| Lee et al. 1996a   | 18   | L183_1                  | 104.41<br>9 | <i>P</i> = 0.0090        | 0.07           | BARC-010255-00571             | A681_1<br>Combined                       |
| Lee et al. 1996a   | 18   | A378_1                  | 101.82<br>3 | <i>P</i> = 0.0160        | 0.06           | Satt191                       | A681_1<br>Combined                       |
| Lee et al. 1996a   | 19   | A169_1                  | 0.902       | <i>P</i> = 0.0010        | 0.13           | BARC-060295-16596             | BLT010_2<br>Combined                     |
| Lee et al. 1996a   | 19   | BARC-039375-07304       | 3.362       | <i>P</i> = 0.0010        | 0.12           | BARC-060295-16596             | Sat_301<br>Combined                      |
| Lee et al. 1996b   | 19   | <i>Dtl</i>              | 78.550      | <i>P</i> ≤ 0.0100        | 0.53           | BARC-013061-00434             | BARC-014655-01607<br>Combined            |
| Lee et al. 1996b   | 19   | <i>Dtl</i>              | 78.550      | LOD = 18.3               | 0.56           | BARC-013061-00434             | BARC-014655-01607<br>Combined            |
| Lee et al. 1996b   | 19   | <i>Dtl</i>              | 78.550      | LOD = 4.5                | 0.21           | A132_2                        | K385_1<br>Athens, GA                     |
| Lee et al. 1996b   | 19   | <i>Dtl</i>              | 78.550      | LOD = 18.3               | 0.56           | BARC-013061-00434             | BARC-014655-01607<br>Blackville, SC      |
| Orf et al. 1999    | 01   | Sat_036                 | 57.517      | LOD = 3.2                | 0.06           | Mng474_2                      | K019_1<br>Rosemount, MN                  |
| Orf et al. 1999    | 02   | Sat_096                 | 10.832      | LOD = 5.0                | 0.10           | BARC-025791-05070             | BARC-022263-04301<br>Los Andes, Chile    |

|                        |    |            |        |              |      |                   |                   |                                  |
|------------------------|----|------------|--------|--------------|------|-------------------|-------------------|----------------------------------|
| Orf et al. 1999        | 06 | Satt277    | 98.344 | LOD = 12     | 0.21 | BARC-019363-03894 | BARC-014491-01561 | Rosemount, MN                    |
| Orf et al. 1999        | 06 | Satt489    | 103.21 | LOD = 8.1    | 0.15 | BARC-064115-18558 | BARC-023441-05388 | Rosemount, MN                    |
| Orf et al. 1999        | 13 | Satt335    | 61.053 | LOD = 9.2    | 0.17 | BARC-900492-00930 | BARC-061189-17109 | Waseca, MN                       |
| Orf et al. 1999        | 19 | Satt182    | 13.074 | LOD = 4      | 0.08 | BLT007_1          | BARC-065445-19463 | Rosemount, MN                    |
| Orf et al. 1999        | 19 | <i>DtI</i> | 78.550 | LOD = 16     | 0.27 | BARC-042135-08184 | BARC-021733-04193 | Rosemount, MN                    |
| Specht et al. 2001     | 06 | Satt365    | 101.53 | LOD = 6.5    | 0.06 | Sat_402           | BARC-051929-11299 | -                                |
| Specht et al. 2001     | 12 | <i>Ps</i>  | 76.766 | LOD = 6.2    | 0.05 | Sat_158           | BARC-026145-05280 | -                                |
| Specht et al. 2001     | 19 | Satt232    | 12.346 | LOD = 13.3   | 0.13 | BLT007_1          | BARC-065445-19463 | -                                |
| Specht et al. 2001     | 19 | L050_7     | 38.811 | LOD = 4.5    | 0.04 | BARC-059443-15806 | peG488_1          | -                                |
| Specht et al. 2001     | 19 | <i>DtI</i> | 78.550 | LOD = 25.8   | 0.27 | BARC-042135-08184 | BARC-021733-04193 | -                                |
| Chapman et al. 2003    | 11 | Satt251    | 38.802 | $P < 0.050$  | 0.04 | BARC-014611-01591 | Sat_247           | Springfield, TN                  |
| Wang et al. 2004       | 09 | Satt137    | 32.300 | LOD = 13.1   | 0.29 | BARC-028040-06720 | Satt518           | -                                |
| Zhang et al. 2004      | 06 | A397_1     | 105.80 | LOD = 8.3    | 0.18 | BARC-024691-05551 | BARC-028441-05872 | Nanjing, China                   |
| Zhang et al. 2004      | 06 | Satt319    | 103.19 | LOD = 7.2    | 0.15 | BARC-014491-01561 | BARC-058239-15169 | Nanjing, China                   |
| Zhang et al. 2004      | 13 | Satt114    | 43.898 | LOD = 3.2    | 0.05 | BARC-023255-03843 | B212_1            | Nanjing, China                   |
| Kabelka et al. 2004    | 02 | Satt542    | 61.840 | LOD = 2.6    | 0.06 | BARC-025183-06457 | BARC-047945-10443 | -                                |
| Reinprecht et al. 2006 | 17 | Satt311    | 72.522 | LOD = 2.0    | 0.05 | BARC-013969-01290 | K011_5            | Ridgetown, Ontario, Canada, 2000 |
| Reinprecht et al. 2006 | 18 | Satt324    | 35.428 | LOD = 3.5    | 0.10 | BARC-018775-03015 | BARC-063985-18522 | Harrow, Ontario, Canada, 2000    |
| Reinprecht et al. 2006 | 11 | Sat_123    | 96.149 | LOD = 2.5    | 0.07 | Satt444           | L050_1            | Woodslee, Ontario, Canada, 2001  |
| Reinprecht et al. 2006 | 01 | Satt071    | 82.883 | LOD = 2.6    | 0.06 | BARC-008013-00215 | BARC-018835-03260 | Woodslee, Ontario, Canada, 2001  |
| Reinprecht et al. 2006 | 19 | Satt182    | 13.074 | LOD = 3.9    | 0.12 | BLT007_1          | BARC-065445-19463 | Ridgetown, Ontario, Canada, 2001 |
| Guzman et al. 2007     | 18 | Satt191    | 89.372 | $P < 0.0012$ | 0.14 | Sat_143           | A681_1            | Columbus, OH, 2003               |
| Guzman et al. 2007     | 18 | Satt191    | 89.372 | $P < 0.0010$ | 0.27 | BARC-059017-15576 | BARC-062769-18043 | West Lafayette, IN, 2004         |
| Guzman et al. 2007     | 14 | Satt534    | 75.727 | LOD = 2.0    | 0.14 | Satt168           | Tel450            | Columbus, OH, 2003               |
| Guzman et al. 2007     | 03 | Satt485    | 28.389 | LOD = 2.1    | 0.13 | <i>L2</i>         | <i>SII</i>        | West Lafayette, IN, 2004         |
| Guzman et al. 2007     | 14 | Satt126    | 23.286 | LOD = 2.1    | 0.12 | BLT013_2          | A329_1            | Columbus, OH, 2003               |
| Guzman et al. 2007     | 03 | Satt257    | 74.707 | $P = 0.0094$ | 0.09 | Satt125           | A363_3            | Combined                         |
| Guzman et al. 2007     | 19 | Satt232    | 12.346 | LOD = 6.7    | 0.34 | Satt723           | B164_1            | West Lafayette, IN, 2004         |
| Panthee et al. 2007    | 05 | Satt225    | 79.303 | LOD = 3.9    | 0.21 | Bng017_1          | BARC-020301-04546 | Combined                         |
| Panthee et al. 2007    | 05 | Satt593    | 24.713 | LOD = 5.2    | 0.33 | BARC-052043-11321 | Satt526           | Combined                         |
| Li et al. 2008         | 20 | Satt330    | 70.117 | LOD = 2.2    | 0.07 | BARC-017311-02261 | BARC-029301-06148 | Lexington, KY, 2004              |

|                       |    |                   |        |              |      |                   |                   |                     |
|-----------------------|----|-------------------|--------|--------------|------|-------------------|-------------------|---------------------|
| Li et al. 2008        | 20 | Satt330           | 70.117 | LOD = 3.4    | 0.10 | Satt049           | BARC-041155-07919 | Princeton, KY, 2003 |
| Li et al. 2008        | 20 | Satt330           | 70.117 | LOD = 3.0    | 0.09 | BARC-053115-11717 | BARC-042685-08348 | Princeton, KY, 2004 |
| Li et al. 2008        | 19 | Satt284           | 33.938 | LOD = 3.4    | 0.10 | Satt182           | Sat_340           | Lexington, KY, 2004 |
| Li et al. 2008        | 19 | Satt284           | 33.938 | LOD = 3.4    | 0.10 | Satt182           | Sat_340           | Princeton, KY, 2003 |
| Li et al. 2008        | 19 | Satt284           | 33.938 | LOD = 6.7    | 0.19 | B164_1            | B162_2            | Princeton, KY, 2003 |
| Li et al. 2008        | 03 | Satt549           | 57.265 | LOD = 2.9    | 0.09 | Sat_208           | BARC-048557-10665 | Lexington, KY, 2004 |
| Li et al. 2008        | 03 | Satt549           | 57.265 | LOD = 2.8    | 0.08 | Satt125           | BARC-061771-17371 | Princeton, KY, 2003 |
| Palomeque et al. 2009 | 09 | Sat_126           | 91.198 | $P = 0.0041$ | 0.10 | Sat_020           | Bng007_1          | Woodstock, 2005     |
| Palomeque et al. 2009 | 09 | Sat_126           | 91.198 | $P < 0.0001$ | 0.19 | BARC-042081-08175 | E014_2            | Ontario, 2005       |
| Palomeque et al. 2010 | 20 | Satt162           | 78.817 | $P = 0.0028$ | 0.09 | BARC-022381-04318 | BARC-042897-08454 | Ottawa, 2006        |
| Kim et al. 2012       | 04 | BARC-039915-07604 | 6.745  | LOD = 1.76   | 0.07 | Sct_186           | Satt578           | -                   |
| Kim et al. 2012       | 18 | BARC-051587-11167 | 44.053 | LOD = 2.7    | 0.13 | BARC-003432-00279 | BARC-027694-06635 | -                   |
| Rossi et al. 2013     | 04 | Satt139           | 49.785 | $P < 0.0100$ | 0.13 | BARC-031795-07219 | BARC-052885-11664 | Ontario, Canada     |
| Rossi et al. 2013     | 06 | Satt277           | 98.344 | $P < 0.0100$ | 0.17 | BARC-041165-07922 | BARC-024923-10366 | Ontario, Canada     |
| Rossi et al. 2013     | 06 | Satt100           | 102.94 | $P < 0.0100$ | 0.19 | Satt277           | BARC-051929-11299 | Ontario, Canada     |
| Rossi et al. 2013     | 14 | Satt126           | 23.286 | $P < 0.0100$ | 0.13 | BARC-049217-10824 | BARC-007338-00165 | MN, USA             |
| Rossi et al. 2013     | 02 | Satt005           | 83.414 | $P < 0.0100$ | 0.09 | Sat_423           | BARC-055839-13759 | Ontario, Canada     |
| Rossi et al. 2013     | 13 | Sat_120           | 58.425 | $P < 0.0100$ | 0.11 | R045_1            | BARC-061189-17109 | MN, USA             |
| Lee et al. 2015       | 04 | BARC-038359-10052 | 5.442  | LOD = 3.8    | 0.13 | Sct_186           | BARC-024117-04765 | Combined            |
| Lee et al. 2015       | 19 | BARC-044415-08701 | 55.881 | LOD = 3.3    | 0.11 | p28_10_2          | A132_2            | Combined            |
| Lee et al. 2015       | 04 | BARC-044691-08761 | 32.272 | $P < 0.0010$ | 0.14 | BARC-015463-01971 | BARC-031123-07000 | -                   |
| Lee et al. 2015       | 19 | BARC-041643-08051 | 25.845 | $P < 0.0030$ | 0.09 | Satt182           | BARC-031583-07115 | -                   |

<sup>a</sup> Proximate markers were indicated when marker information were not available (i.e., Lee et al. 1996a).

<sup>b</sup> The flanking markers were based on the 95% CIs calculated in the current study.

<sup>c</sup> QTL information were identified across locations and/or years.

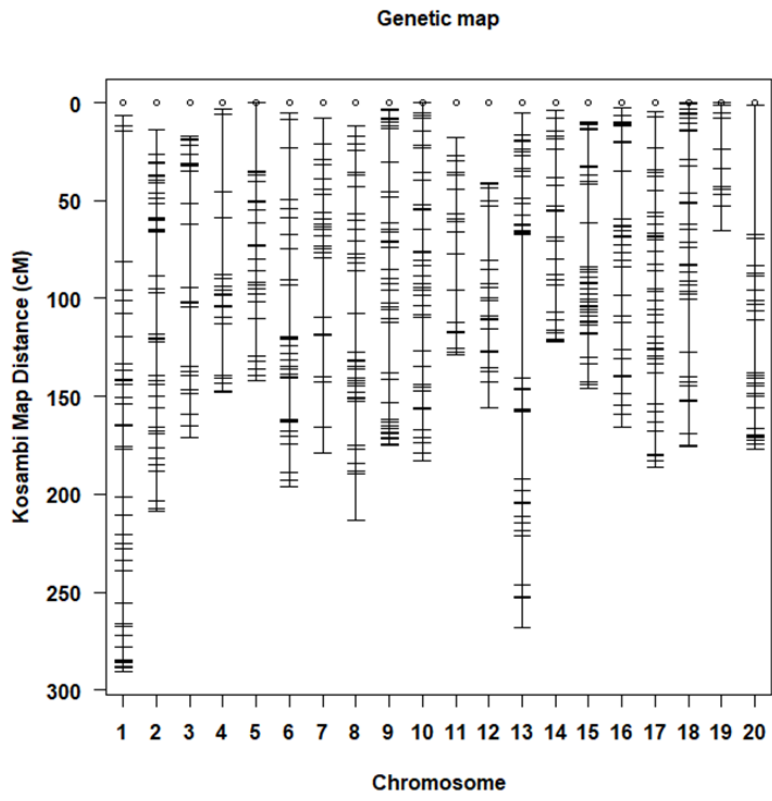

**Supplemental Fig. 1** Genetic map of the Harosoy x Clark (H x C) population.

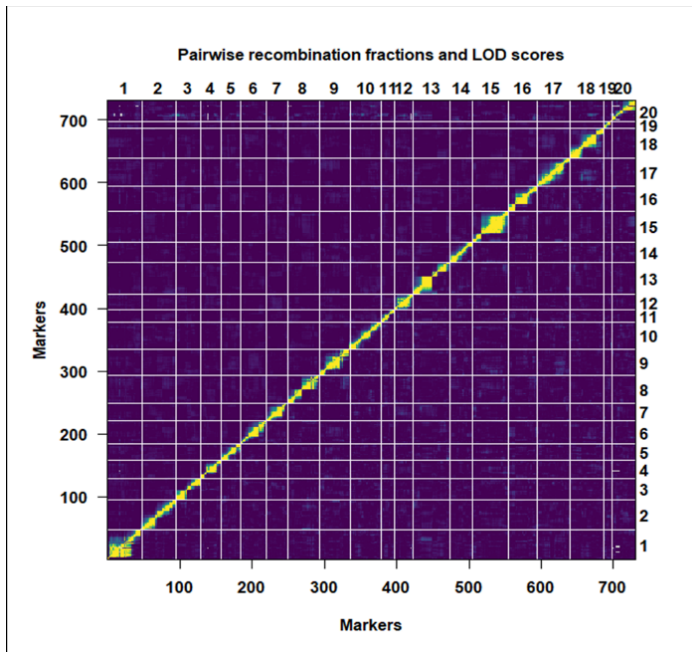

**Supplemental Fig. 2** Plot of estimated pairwise recombination fraction and likelihood of odd values for linkage among markers.
